# Supplementary material
Source: publisher figshare collection journal article supplement (https://tandf.figshare.com/ndownloader/files/24713596)
Supplement: Supplementary file 1 [file 24713596]

>tetraurelia_32

ATGG-----------AAGCAGATCCTTTTATTAAGATCATTGTGGTGGGTGAGCAAGGGGTTGGCAAGACTTGCTTGTTG

AATTAATATTGTTATGAGCGATTTG---AAGCAAATAGTCCTCCAACGATAGGGTGCGATTTTACGACAAAGGTGACTTA

GACGAATGGATAGACTGTTCGATTATAATTGTGGGACATTGCTGGTTAGGAGAAGTATAATGCTGTGAGCAA---ATTGT

ATGTGAGGGGAGCATTGGGTTGTTTAATAGTGTGTGACATAAAGGATCCGAATTCTCTGGA------GGAAACTTTGAAA

TGGAAAAGTATAAT-CGAGGAGAAT--AGTGATCAAAATAATATTCCAATCATGTTGGTGCAGAATAAGTGTGACTTAGC

GAGTGATGATGAGAAGACATCTTATTATCAG-----ACTTTATAAGG-------TTTTGCGAAAACAAATAAATTTTTCT

CCTGCATTCAAACAAGTGCAAAGGAGGGCACAGG-GTTGAAGCAACTGTTCACCGAATTAATCTAAGAGATAATCGACAA

AGGATTACTGGTGAATCAACAGAAGAATTTTAAATAAAGTAATGGT----GGTGTACAATTAA------ATGCTGCTCAA

AGTTCATAGAACCAATAA-CAGAAAAAAGACAAG--ACTTG---TTGT---

>Tetrahymena_7

ATGAGCACAAATAAAAGAAAGCAACTCT--ACAAGATTATCATCTTAGGTGATTCTGGTGTAGGAAAGACTTCTCTTATG

AACCAGTACGTCAACTAGCGTTTTACTCAACAATATAGAGCT---ACAGTTGGTGCTGATTTCATGGCTAAGGAAGTCAC

TATTGATGATCGTATGGTTACATTACAAATTTGGGATACCGCTGGTCAAGAACGTTTCTAATCCCTCGGTGGTGCTTTCT

AT---AGAGGTGCTGACTGCTGTGTTTTGGTCTATGATATTACAAATAAGAAGACCTTTGAAAACTTAGAAAGTTGGAAA

GAAGAATTTAAGCAACAAGGTTGCCCTAAAGATCCTGACACTTTCCCATTTGTTGTTATTGGAAATAAAAGCGATAAAGC

ATCAGA-----AAGAAAAGTT---GAAACTGAGTTTGCTCAATAATGGTGCAAATCTAATGGAGACATTAAGCACT----

------TCGAAACATCTGCCAAGGATGATACTAATGTTAATGCTGCTTTTAT---------------GGCTATTGCTAAG

GCTGCCTCCTCTTAATTCTAAG-----------AAGATGCCATCTT------CTTCCCACCAAAGCCTGTTGTTTTGTAA

ACTGA-TAAGGCCAAAAAGAAAGAAAAAAAGGATG--ACTGCCCTTGT---

>multimic_7b

ATGG---CAAACAAGAAGTAGTACCTTG--AAAAGATTCTTGTTTTAGGAGATTCAGGAGTTGGAAAAACTTCATTATTG

CATCAATACGTCAACACAAAATTTACATTATCGCTTAAACCA---ACAATAGGAGCAGATTTTATGATAAAAGAATTGAA

AATTGATGATAGAATGGTGACTTTATAAATATGGGATACAGCTGGCCAAGAAAGATTCAATTCTTTAAGCAAGGTATTGT

AT---AGACATACTGATTGCTGTGTGTTAGTTTATGATATTACCAATCTAAAATCATTTGAGTCTTTAGAGTTATGGAGG

AGTGAGTTTTTAGATTAAGGATAACCAATGTATCCAGAAAAGTTCCCATTTGTGGTATTTGGAAACAAATTGGATAAGGC

AAATGA-----GAGATAAGTTTCATATGAAATT---GCATAATCCTGGTGCAAATTAAATGGAATCACATAATATT----

------TTGAGGTTTCTGCTTAAGATTCTACTAATCTTGAATAAGCCTTTTA---------------TGAAATTGCTGTG

ATATCAAACAGTCAAGAAAAAT-----------ATGAACAAATTTTTCAAGATTTTCCT----------TTGCTAGACAA

ACCGAAGAAAA---AAGATTATAATTCGAATGA--CATATG---TTGT---

>caudatum_7

ATGT---CAAGCAAGAAGAAATAGCTTT--TTAAAATCATTATTCTAGGTGACTCAGGTGTGGGCAAAACATCTTTAATG

AATCAATACGTCAATGCAAGATTCACACAATAATACAGAGCA---ACAGTGGGTGCAGATTTTATGGCAAAAGAAGTCAT

GATTGATGATAGAATGGTTACATTATAAATTTGGGATACTGCAGGATAAGAAAGATTCTAATCCTTAGGAGGTGCTTTTT

AC---AGAGGAGCTGATTGTTGTGTTCTTGTTTATGATTTGACAAATCCAAAATCATTTGACTCATTGGATTCTTGGAGA

GATGAATTTTTAATGCAAGGATAACCAAAAGATCCAGAACATTTTCCATTTATTGTTTTAGGAAATAAATTAGATAAAGC

AAGTGA-----AAGAAAGGTTCAAGAGGCAAAG---GCTCAATAATGGTGTAAATCTCATGGAAACATATAATTCT----

------TTGAGGTTTCTGCTAAAGATGCTACAAATATTGAGCAAGCCTTTTA---------------GGATATTGCTAAA

GCTGCTGCAAGCCAAGAAAAAG-----------ATGAAGAAATCTT------TTTCCCTACAA------CTGTGACTTTG

ACCAAGCAAGACAAAAAACCTTAAACAAAATAAGGAGGATG---CTGT---

>multimic_7a

ATGT---CAAGCAAGAAGAAATAACTTT--TTAAAATCATCATTTTAGGAGATTCTGGAGTCGGTAAAACTTCTTTAATG

AATTAATACGTCAATGCAAGGTTTACATAATAATATAGAGCA---ACAGTTGGAGCTGATTTCATGGCAAAAGAAGTCAT

GATTGATGATAGAATGGTGACATTATAAATCTGGGACACAGCAGGACAAGAAAGATTCTAATCATTGGGTGGTGCATTTT

AT---AGAGGAGCAGATTGCTGTGTGTTAGTTTATGATATAACAAATCCAAAATCATTTGATTCATTGGATTCATGGAGA

GATGAATTTTTGATGTAAGGATAACCAAAAGATCCAGAACATTTCCCATTTGTGGTATTGGGAAATAAATTGGATAAAGC

AAGTGA-----AAGAAAAGTTTAAGAAGCAAAA---GCACAATCTTGGTGCAAATCACATGGAAATATTTAATTCT----

------TTGAAGTTTCTGCTAAAGATGCAACTAATATTGAATAAGCATTTTA---------------GGATATTGCAAAA

GCTGCTGCTAGTCAAGAAAAAG-----------ATGAAGAAATATT------TTTCCCAACAA------CTGTGACATTA

ACCAAATAAGACCCTAAAAAATAAACAAAGCAATCAGGATG---CTGT---

>sexaurelia_7b

ATGG---CCAGCAAGAAGAAGCAACTTT--TTAAAATCATCATCTTAGGGGATTCAGGTGTAGGTAAAACATCTTTGATG

AATTAATATGTTAATGCAAGGTTCACATAATAATATAGAGCT---ACAGTTGGAGCAGATTTTATGGCAAAAGAAGTTAT

GATTGATGATCGTATGGTTACTCTTTAAATTTGGGACACTGCAGGTTAAGAAAGATTCCAATCTTTAGGAGGTGCATTTT

AT---AGAGGAGCTGATTGCTGTGTATTAGTTTATGACATTACAAATCCAAAATCATTTGATTCTTTGGATTCCTGGAGA

GATGAATTCTTAATGTAAGGTTAACCAAAGGATCCAGATCATTTTCCTTTTGTTGTATTAGGAAATAAATTGGATAAGGC

TACAGA-----AAGGAAAGTTCAAGAATCCAAA---GCTTAATAATGGTGTAAATCACATGGAAATATATAATTCT----

------TTGAAGTTTCAGCTAAGGATGCCACAAATATAGAATAAGCTTTCTA---------------AGATATTGCAAAA

GCTGCTGCAAGTTAGGAAAAAG-----------ATGAAGAAATATT------TTTCCCTACAA------CTGTTACATTA

ACAAAATAAAGCTAAAACCCATAAGCTAAATAAGGAGGATG---CTGT---

>decaurelia_7a1

ATGG---CTAGCAAGAAGAAATAACTTT--TTAAAATCATCATCTTAGGTGATTCAGGAGTAGGAAAAACATCTATAATA

AATTAATATGACAATATAAGGTTCACATAATAATACAGAACC---ACAATTGGAGTAGATTTTATAGCAAAAGAAGTTAT

GATTGATAATCATATGGTTCATCTTTAAATTTGGGACACTGCAGGTTAAGAGAGATTTTAATCACAAGATGGTGCATTTT

AT---AGAGGAGCTGATTGTTGCGTATTAGTTTACGATATCACTAATCCAAAATCATTTGATTCCTTAGATTCATGGAGA

GATAAATTTTTGATGTAAGGTTAACCAAAAGATCCAGAAAATTTTCCTTTTGTTGTATTAGGAAATAAATTGGATAAAGC

CACAGA-----AAGAAAAGTTGAGAAATCTAAA---GCTTAATAATGGTGTAAGTCTCATGGAAACATATAATTCT----

------TTGAAGTATCAGCTAAAGATGCCACAAATATTAAACAAGTTTTTCA---------------AGACATTACAAAA

GCTACTCCAAGTTAGGAAAAAG-----------ATTTAGAAATATT------TTTTCCAGAAA------CTGCGGCATTA

GCTAAATGGAGCCAAAAACCATAAACCAAATAAGCAGGAAG---TTGT---

>quadecaurelia_7

ATGG---CCAGCAAGAAGAAACAACTTT--TTAAAATTATCATTTTAGGTGATTCTGGAGTAGGAAAGACATCTTTAATG

AATTAATATGTTAATGCAAGGTTTACATAATAATATAGAGCC---ACAGTCGGAGCAGATTTTATGGCAAAAGAAGTTAT

GATAGATGATCGTATGGTCACCCTTTAAATTTGGGATACAGCAGGTTAAGAGAGATTTCAATCATTAGGTGGTGCATTTT

AT---AGAGGAGCTGATTGTTGTGTATTAGTTTACGATATAACAAATCCAAAATCATTTGATTCTTTAGATTCTTGGAGA

GATGAATTTTTAATGTAGGGTTAACCAAAAGATCCAGAACATTTTCCTTTTGTCGTTTTAGGAAATAAATTGGATAAAGC

AACAGA-----AAGAAAGGTTTAAGAATCTAAA---AGTTAATAATGGTGTAAATCCCATGGAAATATATAATTCT----

------TTGAAGTATCAGCAAAAGATGCCACAAATATAGAATAAGCATTTCA---------------AGACATTGCAAAA

GCTGCAGCAAGTTAAGAGAAGG-----------ATGAAGAAATATT------TTTCCCTACAA------CAGTGACATTA

ACTAAATAAGATCCAAAGAAATAGACTAAATAAGGAACATG---TTGT---

>sexaurelia_7a

ATGG---CCAGCAAGAAGAAGCAACTTT--TTAAAATTATCATATTAGGTGATTCAGGAGTAGGTAAAACATCTTTGATG

AATTAATATGTCAATGCAAGGTTCACATAATAATATAGAGCT---ACGGTTGGAGCAGATTTTATGGCAAAAGAAGTTAT

GATTGATGATCGAATGGTCACACTTTAAATTTGGGACACAGCAGGCTAAGAAAGATTCTAATCATTAGGTGGCGCATTTT

AT---AGAGGGGCTGATTGTTGTGTATTGGTTTACGATATTACAAATCCAAAATCATTTGATTCTTTGGATTCTTGGAGA

GATGAATTTTTGATGTAAGGTTAACCAAAAGATCCAGAACATTTTCCTTTTGTAGTATTAGGCAATAAATTGGATAAAGC

AACAGA-----AAGAAAAGTTTAAGAATCTAAA---GCTTAATAATGGTGTAAATCACATGGAAATATACAATTCT----

------TTGAAGTTTCTGCTAAAGATGCCACCAATATTGAATAAGCTTTCTA---------------AGACATTGCAAAA

GCTGCAGCAAGCTAGGAAAAAG-----------ATGAAGAAATATT------TTTCCCTACCA------CTGTGACATTA

ACTAAATAGAGTTAAAAACCATAAGCAAAATAAGGAGGATG---CTGT---

>tetraurelia_7b

ATGG---CCAGCAAGAAGAAGCAACTTT--TTAAAATCATCATCTTAGGTGATTCAGGAGTCGGAAAAACATCTTTGATG

AATTAATATGTCAATGCAAGGTTCACTCAATAATATAGAGCT---ACAGTTGGTGCAGATTTTATGGCCAAGGAAGTTAT

GATAGATGATCGTATGGTTACCCTTTAAATTTGGGACACAGCAGGTTAAGAGAGATTCCAATCATTAGGTGGTGCATTTT

AC---AGAGGAGCTGATTGTTGTGTATTAGTATACGATATTACAAATCCAAAATCGTTTGATTCTTTGGATTCTTGGAGA

GATGAATTTCTAATGTAAGGTCAACCAAAAGATCCAGAACATTTTCCTTTTGTCGTCTTAGGAAATAAATTGGATAAAGC

AACAGA-----AAGAAAAGTTTAGGAATCCAAA---AGTTAATAATGGTGTAAATCACACGGAAATATACAATTTT----

------TTGAAGTCTCAGCCAAAGATGCCACAAATATAGAATAAGCTTTCCA---------------AGACATTGCAAAA

GCAGCTGCAAGTTAAGAAAAGG-----------ATGAAGAAATATT------TTTCCCTACAA------CTGTGACATTA

ACTAAATAAGACCCAAAGAAATAGACCAAACAAGGAGGATG---CTGT---

>octaurelia_7b

ATGG---CCAGCCAGAAGAAGCAACTTT--TTAAAATCATCATCTTAGGTGATTCAGGAGTAGGAAAAACATCTTTGATG

AATTAATATGTCAATGCAAGGTTCACTCAATAATATAGAGCT---ACAGTCGGTGCAGATTTTATGGCCAAGGAAGTTAT

GATAGATGATCGCATGGTTACCCTTTAAATTTGGGACACAGCAGGATAAGAGAGATTCCAATCATTAGGTGGTGCATTTT

AC---AGAGGAGCTGATTGTTGTGTATTGGTTTACGATATTACAAATCCAAAATCTTTTGATTCTTTGGATTCTTGGAGA

GATGAATTTTTAATGTAAGGTTAACCAAAAGATCCAGAACATTTTCCTTTTGTCGTTTTGGGAAATAAATTGGATAAAGC

AACAGA-----AAGAAAAGTTTAAGAATCCAAA---AGTTAATAATGGTGTAAATCACACGGAAATATACAATTTT----

------TTGAAGTCTCAGCCAAAGATGCCACAAATATAGAATAAGCTTTCCA---------------AGACATTGCAAAA

GCAGCTGCAAGTTAAGAAAAAG-----------ATGAAGAAATATT------TTTCCCTACAA------CTGTGACATTA

ACTAAATAAGACCCAAAGAAATAGACCAAATAAGGAGGATG---TTGT---

>septaurelia_7

ATGG---CCAGCAAGAAGAAGCAACTTT--TTAAAATCATCATCTTAGGTGATTCAGGAGTAGGAAAAACATCTTTGATG

AATTAATATGTCAATGCAAGGTTCACTCAATAATATAGAGCT---ACAGTCGGTGCAGATTTTATGGCCAAGGAAGTTAT

GATAGATGATCGCATGGTTACCCTTTAAATTTGGGACACAGCAGGATAAGAGAGATTCCAATCATTAGGTGGTGCATTTT

AC---AGAGGAGCTGATTGTTGTGTATTGGTTTACGATATTACAAATCCAAAATCTTTTGATTCTTTGGATTCTTGGAGA

GATGAATTTTTAATGTAAGGTTAACCAAAAGATCCAGAACATTTTCCTTTTGTCGTTTTGGGAAATAAATTGGATAAAGC

AACAGA-----AAGAAAAGTTTAAGAATCCAAA---AGTTAATAATGGTGTAAATCACACGGAAATATACAATTTT----

------TTGAAGTCTCAGCCAAAGATGCCACAAATATAGAATAAGCTTTCCA---------------AGACATTGCAAAA

GCAGCTGCAAGTTAAGAAAAAG-----------ATGAAGAAATATT------TTTCCCTACAA------CTGTGACATTA

ACTAAATAAGACCCAAAGAAATAGACCAAATAAGGAGGATG---CTGT---

>decaurelia_7b

ATGG---CCAGCAAGAAGAAGCAACTTT--TTAAAATCATCATCTTAGGTGATTCAGGAGTAGGAAAAACATCTCTGATG

AATTAATATGTCAATGCAAGGTTCACTCAATAATATAGAGCC---ACAGTTGGTGCAGATTTTATGGCCAAGGAAGTTAT

GATTGATGATCGCATGGTTACTCTTTAAATTTGGGACACAGCAGGTTAAGAGAGATTCCAATCATTAGGTGGTGCATTTT

AC---AGAGGAGCTGATTGTTGTGTCTTAGTTTACGATATTACAAATCCAAAATCATTTGATTCTTTGGATTCTTGGAGA

GATGAATTTTTAATGTAAGGTTAACCAAAAGATCCAGAACATTTTCCTTTTGTCGTTTTAGGAAATAAATTGGATAAAGC

AACAGA-----AAGAAAAGTTTAAGAATCCAAA---AGTTAATAATGGTGTAAATCACACGGAAATATACAATTTT----

------TTGAAGTCTCAGCCAAAGATAACACAAATATAGAATAAGCTTTCTA---------------AGACATTGCAAAA

GCAGCTGCAAGTTAAGAAAAAG-----------ATGAAGAAATATT------TTTCCCTACAA------CTGTGACATTA

ACTAAATAAGACCCAAAGAAATAGACCAAATAAGGAGGATG---CTGT---

>dodecaurelia_7b

ATGG---CCAGCAAGAAGAAGCAACTTT--TTAAAATCATCATCTTAGGTGATTCAGGAGTAGGAAAAACATCTCTGATG

AATTAATATGTCAATGCAAGGTTCACTCAATAATATAGAGCT---ACAGTTGGTGCAGATTTTATGGCCAAGGAAGTTAT

GATTGATGATCGCATGGTTACTCTTTAAATTTGGGACACAGCAGGTTAAGAGAGATTCCAATCATTAGGTGGTGCATTTT

AC---AGAGGAGCTGATTGTTGTGTATTAGTTTACGATATTACAAATCCAAAATCATTTGATTCTTTGGATTCTTGGAGA

GATGAATTTTTAATGTAAGGTTAACCAAAAGATCCAGAACATTTTCCTTTTGTCGTTTTAGGAAATAAATTGGATAAAGC

AACAGA-----AAGAAAAGTTTAAGAATCCAAA---AGTTAATAATGGTGTAAATCACACGGAAACATACAATTTT----

------TTGAAGTCTCAGCCAAAGATGCCACAAATATAGAATAGGCTTTCCA---------------AGACATTGCAAAA

GCAGCTGCAAGTTAAGAAAAAG-----------ATGAAGAAATATT------TTTCCCTACAA------CTGTGACATTA

ACTAAATAAGACCCAAAGAAATAGACCAAATAAGGAGGATG---CTGT---

>biaurelia_7b

ATGG---CCAGCAAGAAGAAGCAACTTT--TTAAAATCATCATCTTAGGTGATTCAGGAGTAGGAAAAACTTCTTTGATG

AATTAATATGTTAATGCAAGGTTCACACAATAATATAGAGCT---ACAGTTGGAGCAGATTTTATGGCAAAAGAAGTTAT

GATTGATGATCGCATGGTAACACTTTAAATTTGGGACACAGCAGGTTAAGAGAGATTCCAATCATTAGGTGGTGCATTTT

AT---AGAGGAGCTGATTGTTGTGTATTAGTTTACGACATCACAACTGCAAAATCATTTGATTCTTTGGATTCTTGGAGA

GATGAATTTTTGATGTAAGGTTAACCAAAAGATCCAGAACATTTTCCTTTTGTCGTTTTAGGAAATAAATTAGATAAAGC

AGCAGA-----AAGAAAAGTTTAAGAATCTAAA---AGTTAATAATGGTGTAAATCACATGGAAATATACAATTCT----

------TTGAAGTATCAGCTAAAGATGCCACAAATATAGAATAAGCTTTCTA---------------AGACATTGCAAAG

GCTGCTGCAAGTCAAGAAAAAG-----------ATGAAGAAATATT------TTTCCCTACAA------CTGTGACATTA

ACTAAATAAGACCCCAAGAAGTAGACGAAATAAGGAGGATG---TTGT---

>novaurelia_7b

ATGG---CAAGCAAGAAGAAACAACTTT--TTAAAATCATTATCTTAGGTGATTCAGGAGTAGGAAAAACATCTTTAATG

AATTAATATGTCAATGCGAGATTTACACAATAATATAGAGCT---ACAGTAGGAGCAGATTTTATGGCAAAAGAAGTTAT

GATTGATGATCGTATGGTAACACTTTAAATTTGGGATACAGCAGGTTAAGAGAGATTTTAATCATTAGGTGGTGCATTTT

AT---AGAGGAGCTGATTGTTGTGTATTAGTATATGATATTACAAATCCAAAATCATTTGATTCTTTGGATTCTTGGAGA

GATGAATTTTTAATGTAAGGTTAACCAAAAGATCCAGAACATTTTCCATTTGTCGTTTTAGGAAATAAATTGGATAAAGC

AACAGA-----AAGAAAAGTTTAAGAATCTAAA---AGTTAATAATGGTGTAAATCACATGGAAATATACAATTCT----

------TTGAAGTATCAGCTAAAGATGCTACAAATATAGAATAAGCTTTCTA---------------AGATATTGCAAAA

GCAGCTGCAAGTTAAGAAAAAG-----------ATGAAGAAATATT------TTTCCCTACAA------CTGTGACATTA

ACTAAATAAGATCCAAAGAAATAGACAAAATAAGGAGGATG---CTGT---

>primaurelia_7b

ATGG---CCAGCAAGAAGAAGCAACTTT--TTAAAATTATCATCTTAGGTGATTCAGGAGTAGGTAAAACTTCTTTGATG

AATTAATATGTTAATGCTAGGTTTACATAATAATATAGAGCA---ACAGTAGGAGCAGATTTTATGGCAAAAGAAGTTAT

GATTGATGATAGAATGGTAACACTTTAAATTTGGGATACAGCAGGTTAAGAGAGATTCCAATCATTAGGTGGTGCATTTT

AT---AGAGGAGCTGATTGTTGTGTATTAGTTTACGATATTACAAATCCAAAATCATTTGATTCTTTGGATTCTTGGAGA

GATGAATTTTTAATGTAAGGTTAACCAAAAGATCCAGAACATTTTCCTTTTGTCGTTTTAGGAAATAAATTGGATAAAGC

AACAGA-----AAGAAAAGTTTAAGAATCTAAA---AGTTAATAATGGTGTAAATCACATGGAAATATATAATTCT----

------TTGAAGTATCAGCTAAAGATGCAACTAATATAGAATAAGCTTTTTA---------------AGACATAGCTAAA

GCAGCTGCAAGTTAAGAAAAAG-----------ATGAAGAAATATT------TTTCCCTACAA------CTGTGACACTA

ACTAAATAAGACCCCAAGAAATAAGCAAAATAAGGAGGATG---CTGT---

>dodecaurelia_7a2

ATGA---TCAGCAATGAGAAGCAACTTT--TCAAAATCATCATCTTAGGTGATTCAGGAGTAGGAAAAACATCTTTGATG

AATTAATATGTCAATACAAGGTTCACATAATAATACAAAGCT---ACAATTGGGGCAGATTTTATGGCAAAAGAAGTTAC

GATTGATGATCGTACGGTTACTCTCTAAATTTGGGACACTGCAGGTTAAGAGAGATTTTAATCATTAAGTAGTGCATTTT

AT---AGAGGAGCTGATTGCTGTGTATTAGTTTGCGATATCACTAATCCAAAATCACTTGATTCCTTAGATTTATGGAGA

GATGAATTTTTGATATAAGGTTAACCAAAAGATTTAGAACATTTTCCTTTTGTTGTATTAGGAAATAAATTGGATAAAGC

CACAGA-----AAGAAAAGTTTAGGAATCTAAC---GCTTAATAATGGTGTAAGTCTCATGGAAACATATAATTCT----

------TAGAAGTATCAGCTAAAGATTCAATAAATATTGAACAAGCTTTTCA---------------AGTCATTGCAAAA

GCTGCTGCAAGTTATGAAAAAG-----------ATGTAGAAATATT------TTTCCCTACGC------CTGTAACATCA

ACTAAATAGGATCAAAAACCAGAAGCTGAATAGAGCCAAAAACAATTTCAA

>jenningsi_7a1

ATGG---CCAGCAAGAAGAAGCAACTTT--TTAAAATCATCATCTTAGGTGATTCAGGAGTCGGAAAAACATCTTTAATG

AATTAATATGTTAATGCAAGGTTCACATAATAATATAGAGCT---ACAGTAGGAGCAGATTTTATGGCAAAAGAAGTTAT

GATAGATGATAGAATGGTAACTCTTTAAATTTGGGACACTGCAGGCTAAGAAAGATTTCAATCATTAGGTGGTGCATTTT

AT---AGAGGAGCTGATTGTTGTGTATTAGTTTACGATATTACAAATCCTAAATCATTTGATTCTTTGGATTCTTGGAGA

GATGAATTTTTGATGTAAGGTTAACCAAAAGATCCAGAACATTTTCCTTTTGTTGTATTAGGAAATAAATTAGATAAAGC

TACAGA-----AAGAAAAGTTTAAGAATCTAAA---GCATAATAATGGTGTAAATCACATGGAAATATATAATTCT----

------TTGAAGTTTCAGCTAAAGATGCAACAAATATTGAACAAGCTTTCTA---------------AGATATTGCTAAA

GCAGCTGCAAGCTAAGAAAAAG-----------ATGAAGAAATATT------TTTCCCTACAA------CTGTGACATTA

ACGAAATAGAGCCAAAAACCATAAACTAAATAAGGAGGATG---TTGC---

>jenningsi_7a2

ATGG---CCAGCAAGAAGAAGCAACTTT--TTAAAATCATCATCTTAGGTGATTCAGGAGTCGGAAAAACATCTTTAATG

AATTAATATGTTAATGCAAGGTTCACATAATAATATAGAGCT---ACAGTAGGAGCAGATTTTATGGCAAAAGAAGTTAT

GATAGATGATAGAATGGTAACTCTTTAAATTTGGGACACTGCAGGCTAAGAAAGATTTCAATCATTAGGTGGTGCATTTT

AT---AGAGGAGCTGATTGTTGTGTATTAGTTTACGATATTACAAATCCTAAATCATTTGATTCTTTGGATTCTTGGAGA

GATGAATTTTTGATGTAAGGTTAACCAAAAGATCCAGAACATTTTCCTTTTGTTGTATTAGGAAATAAATTAGATAAAGC

TACAGA-----AAGAAAAGTTTAAGAATCTAAA---GCATAATAATGGTGTAAATCACATGGAAATATATAATTCT----

------TTGAAGTTTCAGCTAAAGATGCAACAAATATTGAACAAGCTTTCTA---------------AGATATTGCTAAA

GCAGCTGCAAGCTAAGAAAAAG-----------ATGAAGAAATATT------TTTCCCTACAA------CTGTGACATTA

ACGAAATAAGACCCCAAGAAATAGACAAAATAGGGTGGATG---CTGT---

>octaurelia_7a1

ATGG---CCAGCCAGAAGAAGCAACTTT--TTAAAATCATCATCTTGGGTGATTCAGGAGTAGGAAAAACATCTTTGATG

AATTAATATGTCAATGCAAGGTTCACTTAATAATACAGAGCT---ACAGTCGGAGCAGATTTTATGGCCAAAGAAGTTAT

GATAGATGATCGCATGGTTACTCTTCAAATTTGGGACACTGCAGGCTAAGAGAGATTCCAATCATTAGGTGGAGCATTTT

AT---AGAGGAGCTGATTGTTGTGTATTAGTTTACGATATCACAAATCCAAAATCATTTGATTCATTGGATTCATGGAGA

GATGAATTTTTAATGTAAGGTTAACCAAAAGATCCAGAACATTTTCCTTTTGTTGTTTTAGGAAATAAATTAGATAAAGC

CACAGA-----AAGAAAAGTTTAGGAATCTAAA---GCTTAATAATGGTGTAAATCACATGGAAACATACAATTCT----

------TTGAAGTATCAGCTAAAGATGCCACAAATATTGAACAAGCCTTTCA---------------AGACATTGCAAAA

GCTGCAGCAAGTTAGGAAAAAG-----------ATGAAGAAATATT------TTTCCCTACAA------CTGTGACATTA

ACTAAATAGAGCCAAAAACCATAAGCCAAATAAGGAGGATG---TTGT---

>octaurelia_7a2

ATGG---CCAGCCAGAAGAAGCAACTTT--TTAAAATCATCATCTTAGGTGATTCAGGAGTAGGAAAAACATCTTTGATG

AATTAATATGTAAATGCAAGGTTCACTTAATAATACAGAGCT---ACAGTCGGAGCAGATTTTATGGCTAAAGAAGTTAT

GATAGATGATCGTATGGTTACCCTTCAAATCTGGGACACTGCAGGTTAAGAGAGATTCCAATCATTAGGTGGAGCATTTT

AT---AGAGGAGCTGATTGTTGTGTATTAGTTTACGATATCACAAATCCAAAATCATTTGATTCATTGGATTCATGGAGA

GATGAATTTTTAATGTAAGGTTAACCAAAAGATCCAGAACATTTTCCTTTTGTTGTTTTAGGAAATAAATTAGATAAAGC

CACAGA-----AAGAAAAGTTTAGGAATCTAAA---GCTTAATAATGGTGTAAATCACATGGAAACATACAATTCT----

------TTGAAGTATCAGCTAAAGATGCCACAAATATTGAACAAGCTTTTCA---------------AGACATTGCAAAG

GCTGCAGCAAGTTAGGAAAAAG-----------ATGAAGAAATATT------CTTCCCTACAA------CTGTGACATTA

ACTAAATAGAGCCAAAAACCATAAGCCAAATAAGGAGGATG---TTGT---

>decaurelia_7a2

ATGG---CTAGCAAGAAGAAACAACTTT--TTAAAATCATCATCTTAGGTGATTCAGGAGTAGGAAAAACATCTTTGATG

AATTAATATGTCAATGCAAGGTTCACATAATAATACAGAGCT---ACAGTTGGAGCAGATTTTATGGCAAAAGAAGTTAT

GATTGATGATCGTATGGTTACTCTTTAAATTTGGGACACTGCAGGTTAAGAGAGATTTTAATCATTGGGTGGTGCATTTT

AT---AGAGGAGCTGATTGCTGCGTATTAGTTTACGATATCACTAATCCAAAATCATTTGATTCCTTAGATTCATGGAGA

GATGAATTTTTAATGTAAGGATAACCAAAAGATCCAGAACATTTTCCTTTTGTTGTATTAGGAAATAAATTGGATAAAGC

CACAGA-----AAGAAAAGTTTAGGAATCTAAA---GCTTAATAATGGTGTAAGTCTCATGGAAACATATAATTTT----

------TTGAAGTATCAGCTAAAGATGCCACAAATATTGAACAAGCTTTTCA---------------AGACATTGCAAAA

GCTGCTGCAAGTTAGGAAAAAG-----------ATGAAGAAATATT------TTTCCCTACAA------CTGTGACATTA

ACTAAATAGAGTCAAAAACCATAAGCCAAATAAGGAGGATG---TTGT---

>dodecaurelia_7a1

ATGG---CTAGCAAGAAGAAACAGCTTT--TTAAAATCATCATCTTAGGTGATTCAGGAGTAGGAAAAACATCTTTGATG

AATTAATATGTCAATGCAAGGTTCACATAATAATACAGAGCT---ACAGTTGGGGCAGATTTTATGGCAAAAGAAGTTAT

GATTGATGATCGTATGGTTACTCTCTAAATTTGGGACACTGCAGGTTAAGAGAGATTTTAATCATTAGGTGGTGCATTTT

AT---AGAGGAGCTGATTGCTGTGTATTAGTTTACGATATCACTAATCCAAAATCATTTGATTCCTTAGATTCATGGAGA

GATGAATTTTTGATGTAAGGTTAACCAAAAGATCCAGAACATTTTCCTTTTGTTGTATTAGGAAATAAATTGGATAAAGC

CACAGA-----AAGAAAAGTTTAGGAATCTAAA---GCTTAATAATGGTGTAAGTCTCATGGAAACATATAATTCT----

------TTGAAGTATCAGCTAAAGATGCCACAAATATTGAACAAGCTTTTCA---------------AGACATTGCAAAA

GCTGCTGCAAGTTAGGAAAAAG-----------ATGAAGAAATATT------TTTCCCTACAA------CTGTGACATTA

ACTAAATAGAGCCAAAAACCATAAGCCAAATAAGGAGGATG---TTGT---

>tetraurelia_7a2

ATGG---CTAGCAAGAAGAAGCAACTTT--TTAAAATCATCATCTTAGGTGATTCAGGAGTCGGAAAAACATCTTTGATG

AATTAATATGTCAATGCAAGGTTCACTTAATAATACAGGGCT---ACAGTTGGAGCAGATTTTATGGCCAAAGAAGTTAT

GATTGATGATCGTATGGTTACACTTTAAATTTGGGACACTGCAGGTTAAGAGAGATTCCAATCATTAGGTGGTGCATTTT

AT---AGAGGAGCTGATTGCTGCGTATTAGTTTACGATATCACAAATCCAAAATCATTTGATTCATTGGATTCATGGAGA

GATGAATTTTTAATGTAAGGTTAACCAAAAGATCCAGAACATTTTCCTTTTGTTGTATTAGGAAATAAATTAGATAAAGC

CTCAGA-----AAGAAAAGTTTAGGAATCTAAA---GCTTAATAATGGTGTAAATCTCATGGAAACATATAATTCT----

------TTGAAGTATCAGCTAAAGATGCCACAAACATTGAACAAGCTTTTCA---------------AGACATTGCAAAA

GCTGCTGCAAGTTAGGAAAAAG-----------ATGAAGAAATATT------TTTCCCTACAA------CTGTGACATTA

ACTAAATAGAGCCAAAAACCATAAGCCAAATAAGGAGGATG---TTGT---

>jenningsi_7a3

ATGT---CCAGCAAAAAGAAGCAATTGT--TTAAAATAATTATCTTAGGTGATTCAGGAGTAGGAAAAACATCGTTGATG

AATTAATATGTTAATGCAAGATTCACATAATAATATAGAGCT---ACAGTTGGAGCAGATTTTATGGCAAAAGAAGTTAT

GATTGATGATCGTATGGTTACTCTATAAATTTGGGACACTGCAGGTTAAGAGAGATTCCAATCATTAGGTGGAGCATTTT

AT---AGAGGAGCTGATTGTTGTGTCTTAGTTTATGATATTACAAATCCAAAATCTTTTGATTCATTGGATTCTTGGAGA

GATGAATTTTTAATGTAAGGTTAACCAAAAGATCCAGAACATTTTCCTTTTGTTGTATTAGGAAATAAATTAGATAAAGC

TACAGA-----AAGAAAAGTTTAAGAATCTAAA---GCTTAATAATGGTGTAAATCACATGGAAATATTCAATTCT----

------TTGAAGTCTCAGCTAAAGATGCAACAAATATTGAATAAGCATTTCA---------------AGATATTGCTAAA

GCTGCTGCAAGCTAAGAAAAAG-----------ATGAAGAAATATT------TTTCCCTACAA------CTGTGACTTTA

ACTAAATAGAGCCAAAAACCATAAGCCAAATAAGGAGGATG---CTGC---

>jenningsi_7a4

ATGT---CCAGCAAAAAGAAGCAATTGT--TTAAAATAATTATCTTAGGTGATTCAGGAGTAGGAAAAACATCGTTGATG

AATTAATATGTTAATGCAAGATTCACATAATAATATAGAGCT---ACAGTTGGAGCAGATTTTATGGCAAAAGAAGTTAT

GATTGATGATCGTATGGTTACTCTATAAATTTGGGACACTGCAGGTTAAGAGAGATTCCAATCATTAGGTGGAGCATTTT

AT---AGAGGAGCTGATTGTTGTGTCTTAGTTTATGATATTACAAATCCAAAATCTTTTGATTCATTGGATTCTTGGAGA

GATGAATTTTTAATGTAAGGTTAACCAAAAGATCCAGAACATTTTCCTTTTGTTGTATTAGGAAATAAATTAGATAAAGC

TACAGA-----AAGAAAAGTTTAAGAATCTAAA---GCTTAATAATGGTGTAAATCACATGGAAATATTCAATTCT----

------TTGAAGTCTCAGCTAAAGATGCAACAAATATTGAATAAGCATTTCA---------------AGATATTGCTAAA

GCTGCTGCAAGCTAAGAAAAAG-----------ATGAAGAAATATT------TTTCCCTACAA------CTGTGACTTTA

ACTAAATAAGACCCAAAAAAGCAGAATAAATAGGGAGTATG---TTGT---

>biaurelia_7a1

ATGG---CCAGCAAGAAGAAATAACTTT--TTAAAATCATTATCTTAGGTGATTCAGGAGTAGGAAAAACATCTTTAATG

AATTAATATGTTAATGCAAGATTCACATAATAATATAGAGCT---ACAGTAGGAGCAGATTTTATGGCAAAAGAAGTTAT

GATTGATGATCGCATGGTTACTCTTTAAATTTGGGATACTGCAGGATAAGAAAGATTCTAATCATTAGGTGGTGCATTTT

AT---AGAGGAGCTGATTGTTGTGTATTAGTTTACGATATCACAAATCCAAAATCATTTGATTCCTTAGATTCTTGGAGA

GATGAATTTTTAATGTAAGGTTAACCAAAAGATCCAGAACATTTCCCTTTTGTTGTATTGGG-AATAAATTGGATAAAGC

TACAGA-----A--GAAAGTTTAAGAATCTAAA---GCATAATAATGGTGTAAATCTCATGGAAATATATAATTCT----

------TTGAAGTATCTGCTAAAGATGCAACTAATATTGAATAAGCATTTTA---------------AGACATTGCAAAA

GCTGCTGCAAGTTAGGAAAAAG-----------ATGAAGAAATATT------TTTCCCTACAA------CTGTGACATTA

ACTAAATAGAGTTAAAAACCATAAGCTAAATAAGGAGGATG---CTGT---

>biaurelia_7a2

ATGG---CCAGCAAGAAGAAACAACTTT--TTAAAATCATTATCTTAGGTGATTCAGGAGTAGGAAAAACATCTTTAATG

AATTAATATGTTAATGCAAGATTCACATAATAATATAGAGCT---ACAGTAGGAGCAGATTTTATGGCAAAAGAAGTTAT

GATTGATGATCGCATGGTTACTCTTTAAATTTGGGATACTGCAGGATAAGAAAGATTCTAATCATTAGGTGGTGCATTTT

AT---AGAGGAGCTGATTGTTGTGTATTAGTTTACGATATCACAAATCCAAAATCATTTGATTCCTTAGATTCTTGGAGA

GATGAATTTTTAATGTAAGGTTAACCAAAAGATCCAGAACATTTCCCTTTTGTTGTATTGGGAAATAAATTGGATAAAGC

TACAGA-----AAGAAAAGTTTAAGAATCTAAA---GCATAATAATGGTGTAAATCTCATGGAAATATATAATTCT----

------TTGAAGTATCTGCTAAAGATGCAACTAATATTGAATAAGCATTTTA---------------AGACATTGCAAAA

GCTGCTGCAAGTTAGGAAAAAG-----------ATGAAGAAATATT------TTTCCCTACAA------CTGTGACATTA

ACTAAATAGAGTTAAAAACCATAAGCTAAATAAGGAGGATG---CTGT---

>primaurelia_7a

ATGG---CCAGCAAGAAGAAGCAACTTT--TTAAAATTATCATTTTAGGTGATTCAGGAGTAGGAAAAACATCTTTAATG

AATTAATATGTTAATGCAAGGTTCACATAATAATATAGAGCT---ACAGTTGGAGCAGATTTTATGGCAAAAGAAGTTAT

GATTGATGATCGTATGGTTACTCTTTAAATTTGGGACACTGCAGGTTAAGAAAGATTCTAATCATTAGGTGGTGCATTTT

AT---AGAGGAGCTGATTGTTGTGTATTAGTTTATGATATTACAAATCCAAAATCATTTGATTCATTGGATTCTTGGAGA

GATGAATTTTTAATGTAAGGTTAACCAAAAGATCCAGAACATTTTCCTTTTGTTGTATTAGGAAATAAATTAGATAAAGC

TACAGA-----AAGAAAAGTTTAAGAATCTAAA---GCATAATAATGGTGTAAATCTCATGGAAATATATAATTCT----

------TTGAAGTATCAGCTAAAGATGCCACAAATATTGAATAAGCCTTTTA---------------AGACATTGCAAAA

GCAGCTGCAAGCTAGGAAAAAG-----------ATGAAGAAATATT------TTTCCCTACAA------CTGTGACATTA

ACTAAATAGGACCCCAAGAAATAGCAAAAATAAGGAGGATG---TTGT---

>novaurelia_7a1

ATGG---CCAGCAAGAAGAAGCAACTTT--TTAAAATCATTATCTTAGGTGATTCAGGAGTAGGAAAAACATCTTTAATG

AATTAATATGTCAATGCAAGATTCACATAATAATATAGAGCT---ACAGTTGGAGCAGATTTTATGGCAAAAGAAGTTAT

GATAGATGATCGTATGGTTACTCTTTAAATTTGGGACACTGCAGGTTAAGAGAGATTCTAATCATTAGGTGGTGCATTTT

AT---AGAGGAGCTGATTGTTGTGTATTAGTTTACGATATCACAAATCCAAAATCATTTGATTCCTTGGATTCTTGGAGA

GATGAATTTTTAATGTAAGGTTAACCAAAAGATCCAGAACATTTTCCTTTTGTTGTATTAGGAAATAAATTGGATAAAGC

AACAGA-----AAGAAAAGTTTAAGAATCTAAA---GCTTAATAATGGTGTAAATCTCATGGAAACATATAATTCT----

------TTGAAGTATCAGCTAAAGATGCCACAAATATTGAATAAGCTTTTCA---------------AGACATTGCAAAA

GCAGCTGCAAGCTAGGAAAAAG-----------ATGAAGAAATATT------TTTCCCTACAA------CTGTGACATTA

ACTAAATAGGACCCCAAGAAATAGGCAAAATAAGGAGGATG---TTGT---

>novaurelia_7a2

ATGG---CCAGCAAGAAGAAGCAACTTT--TTAAAATCATTATCTTAGGTGATTCAGGAGTAGGAAAAACATCTTTAATG

AATTAATATGTCAATGCAAGATTCACATAATAATATAGAGCT---ACAGTTGGAGCAGATTTTATGGCAAAAGAAGTTAT

GATAGATGATCGTATGGTTACTCTTTAAATTTGGGACACTGCAGGTTAAGAGAGATTCTAATCATTAGGTGGTGCATTTT

AT---AGAGGAGCTGATTGTTGTGTATTAGTTTACGATATCACAAATCCAAAATCATTTGATTCCTTGGATTCTTGGAGA

GATGAATTTTTAATGTAAGGTTAACCAAAAGATCCAGAACATTTTCCTTTTGTTGTATTAGGAAATAAATTGGATAAAGC

AACAGA-----AAGAAAAGTTTAAGAATCTAAA---GCTTAATAATGGTGTAAATCTCATGGAAACATATAATTCT----

------TTGAAGTATCAGCTAAAGATGCCACAAATATTGAATAAGCTTTTCA---------------AGACATTGCAAAA

GCAGCTGCAAGCTAGGAAAAAG-----------ATGAAGAAATATT------TTTCCCTACAA------CTGTGACATTA

ACTAAATAGAACCAAAAACCATAAGCTAAATAAGGAGGATG---CTGT---

>tetraurelia_7a1

ATGG---CCAGCCAGAAGAAGCAACTTT--TTAAAATCATCATCTTAGGTGATTCAGGAGTCGGAAAATCAGCTTTGATG

GATTAATATGTCAATGCAAGGTTCACTTAATTATACAAAGCTT---CAGTTGGAACAGATTTTATGGGCAAAAAAGTTAT

GATTGATGATCGTATGGTTACACTTTAACTTTGGGACACTGCAGGTTAAGAGAGATTCCAATCATTAGGTGGTGCATTTT

AT---AGAGGAGCTGATTGCTGCGTATTAGTTTATGATATCACAAATCCAAAATCATTTGATTCTTTGGATTCATAGAGA

AATGAATTTTTAATGTAAGGTTAACCAAAATATCCAGAACATTTTCCTTTTTTTGTATTAGGAAATAAATTAGATAAAGC

CTC-----ATAAAGAAAGGTTTAGGAATCTAAA---GCTTAATAATGGTGTAAATCTCATGGAAACATATAATTCT----

------TTGAAGTATCAGCTAAAGATGCCACAAACATTGAACAAGCTTTTCA---------------AGACATTGCAAAA

GCTGCTGCAAGTTAGGAAAAAG-----------ATGAAGAAATATT------TTTCCCTACAA------CTGTGACATTA

ACTAAATAGAGCCAAAAACCATAAGCCAAATAAGGAGGATG---TTGT---

**Figure S3.** The full alignment of all sequences used to make the phylogeny in Figure S2 and detailed in Table S1. Text files of all alignments suitable for analysis by phylogenetics programs are available upon request.
